# Supplementary material
Source: HighWire-hosted journal article supplement (https://gpsych.bmj.com/content/31/1/e000006)
Supplement: inline-supplementary-material-1 [file inline-supplementary-material-1.docx]

**产前多聚I: C暴露大鼠子代的小胶质细胞激活：PET显像和Immunohistochemistry Study**

李雪，田鑫，吕路线，黑钢瑞，黄旭枫，范晓舵，张锦明，张建江，庞礼娟，宋学勤

**背景：**尤利乌斯-瓦格纳·Juulgg著名的“热疗”可能是精神分裂症免疫学概念研究的开端。小胶质细胞作为脑内的主要免疫效应细胞，在神经炎症过程中起着举足轻重的作用。孕期母体病毒感染与精神分裂症的风险增加有关，推测包括神经发育障碍，包括孤独症谱系障碍和精神分裂症。本研究旨在通过11C-PK11195 PET和免疫组织化学方法，定量检测妊娠期聚I:C大鼠成熟子代的小胶质细胞活化。

**目标：**这项研究的目的是定量在产前PyII:C暴露大鼠的成熟子代前额叶皮质和海马中的小胶质细胞激活。

**方法：**PyII: C处理的水坝的后代是模型组，盐水处理的水坝的后代是对照组。通过自发活动、预脉冲抑制（PPI）和潜伏抑制（LI）试验（包括主动回避-调节任务和被动回避-调节任务）对两组进行行为测试。随机选择成功的模型大鼠，采用行为学方法检测模型组和对照组大鼠。11C-PK11195微PET/CT和免疫组织化学染色在选定的大鼠上测量小胶质细胞活化。

**结果：**治疗组与对照组相比，PPI和LI均出现明显的运动障碍。治疗组前额叶皮层11C-PK11195摄取率增加（t= -3.990，P＝0.003）和海马（t＝-4.462，P＝0.001）。治疗组的活化小胶质细胞数量明显高于对照组（海马组：T＝8.204 P < 0.001；前额叶：T＝6.995，P〈0.001）。治疗组与对照组相比，PET和免疫组化对小胶质细胞活化有显著的相关性。

**结论：**本研究显示在出生前PyII:C暴露大鼠的成熟子代前额叶皮质和海马中的小胶质细胞激活。这项研究表明，小胶质细胞活化可能在精神分裂症的发病机制中发挥潜在的或潜在的作用。

**关键词：**精神分裂症、宠物、小胶质细胞、海马的神经源性炎症
